# Supplementary material for: Molecular Evolutionary Analysis of the HCRTR Gene Family in Vertebrates
Source: Biomed Res Int. 2018 Jun 4;2018:8120263. doi: 10.1155/2018/8120263 (PMC6008884; doi:10.1155/2018/8120263)
Supplement: Supplementary Materials — The additional file records the information of species and sequences we used in phylogenetic analysis. LPSD1, LPSD2, and LAA mean location of protein structure domain 1 (7tm_1), location of protein structure domain 2 (Orexin_rec2), and length of amino acids, respectively. The highlighted items are parts of the 38 representative species used for Blastn and some species are not listed in the table: black-capped squirrel monkey (XM_010337142.1), Damaraland mole-rat (XM_010628936.1), dromedary (XM_010995387.1), African bush elephant (XM_010587000.1), killer whale (XM_012532256.1), large flying fox (XM_011375020.1), Chinese alligator (XM_006035463.1), and western clawed frog (XM_002934850.3). [file 8120263.f1.xlsx]

## Sheet: Sheet1
Additional file 1. Sequences imformation
Order	Family	Common name	Accession	Scientific name	LPSD1	LPSD2	LAA
HCRTR1
Primates	Cercopithecidae	Peters's Angola colobus	XM_011955457.1	Colobus angolensis palliatus	63 to 358		425
		golden snub-nosed monkey	XM_010353772.1	Rhinopithecus roxellana	63 to 358		425
	Hominidae	human	NM_001525.2	Homo sapiens	63 to 358		425
		western lowland gorilla	XM_004025344.2	Gorilla gorilla gorilla	63 to 358		425
		Sumatran orangutan	XM_002811135.2	Pongo abelii	63 to 358		425
	Callitrichidae	common marmoset	XM_002750543.3	Callithrix jacchus	63 to 354		421
	Galagidae	northern greater galago	XM_003800745.2	Otolemur garnettii	63 to 357		424
	Indriidae	Coquerel's sifaka	XM_012642315.1	Propithecus coquereli	63 to 357		424
	Tarsiidae	Philippine tarsier	XM_008066771.1	Tarsius syrichta	63 to 358		425
Rodentia	Cricetidae	deer mouse	XM_006975548.2	Peromyscus maniculatus bairdii	63 to 358		414
	Muridae	house mouse	BC119583.2	Mus musculus	63 to 358		416
		brown rat	NM_013064.1	Rattus norvegicus	63 to 358		416
	Heterocephalidae	naked mole-rat	XM_004850820.1	Heterocephalus glaber	63 to 360		427
	Spalacidae	Upper Galilee Mountains blind mole-rat	XM_008848202.1	Nannospalax galili	63 to 358		425
	Heteromyidae	Ord's kangaroo rat	XM_013020558.1	Dipodomys ordii	63 to 358		425
	Dipodidae	lesser Egyptian jerboa	XM_004665288.1	Jaculus jaculus	63 to 359		426
	Caviidae	guinea pig	XM_003471224.3	Cavia porcellus	63 to 358		425
Artiodactyla	Bovidae	cow	NM_001048182.1	Bos taurus	63 to 358		425
		Tibetan antelope	XM_005959512.1	Pantholops hodgsonii	63 to 358		425
	Physeteridae	sperm whale	XM_007113372.1	Physeter catodon	63 to 358		425
	Lipotidae	baiji	XM_007468652.1	Lipotes vexillifer	63 to 358		425
	Balaenopteridae	northern minke whale	XM_007170583.1	Balaenoptera acutorostrata scammoni	63 to 358		425
	Camelidae	wild Bactrian camel	XM_006176182.2	Camelus ferus	100 to 395		462
		Bactrian camel	XM_010952186.1	Camelus bactrianus	99 to 394		461
		alpaca	XM_006196907.2	Vicugna pacos	99 to 394		461
Carnivora	Felidae	domestic cat	XM_003989799.2	Felis catus	65 to 360		427
		cheetah	XM_015080599.1	Acinonyx jubatus	65 to 360		427
		Siberian tiger	XM_007092400.2	Panthera tigris altaica	67 to 362		429
	Ursidae	giant panda	XM_002923975.2	Ailuropoda melanoleuca	65 to 360		427
		polar bear	XM_008694483.1	Ursus maritimus	65 to 360		427
	Canidae	domestic dog	XM_003638937.3	Canis lupus familiaris	65 to 360		427
	Odobenidae	walrus	XM_004406397.1	Odobenus rosmarus divergens	65 to 360		427
	Phocidae	Weddell seal	XM_006747220.1	Leptonychotes weddellii	65 to 360		386
	Mustelidae	ferret	XM_013046649.1	Mustela putorius furo	65 to 362		411
Chiroptera	Vespertilionidae	David's myotis	XM_006777399.2	Myotis davidii	63 to 358		423
		big brown bat	XM_008157028.1	Eptesicus fuscus	63 to 358		423
		Natal long-fingered bat	XM_016219701.1	Miniopterus natalensis	63 to 360		427
Perissodactyla	Equidae	Przewalski's horse	XM_008538561.1	Equus przewalskii	63 to 358		425
Eulipotyphla	Talpidae	star-nosed mole	XM_004678726.1	Condylura cristata	63 to 358		425
	Soricidae	common shrew	XM_004603728.1	Sorex araneus	57 to 352		419
Lagomorpha	Leporidae	common rabbit	XM_017350268.1	Oryctolagus cuniculus	63 to 358		416
	Ochotonidae	American pika	XM_004591642.1	Ochotona princeps	63 to 358		416
Cingulata	Dasypodidae	nine-banded armadillo	XM_012530129.1	Dasypus novemcinctus	132 to 427		494
Macroscelidea	Macroscelididae	Cape elephant shrew	XM_006894947.1	Elephantulus edwardii	63 to 357		423
Tubulidentata	Orycteropodidae	aardvark	XM_007954125.1	Orycteropus afer afer	63 to 358		425
Monotremata	Ornithorhynchidae	platypus	XM_001506973.3	Ornithorhynchus anatinus	63 to 352		415
Coelacanthiformes	Latimeriidae	West Indian Ocean coelacanth	XM_005997238.2	Latimeria chalumnae	140 to 443	489 to 523	523
Lepisosteiformes	Lepisosteidae	spotted gar	ENSLOCG00000001293	Lepisosteus oculatus	70 to 373		442
HCRTR2
Primates	Hominidae	human	NM_001526.3	Homo sapiens	71 to 364	387 to 444	444
		western lowland gorilla	XM_004044226.2	Gorilla gorilla gorilla	71 to 364	387 to 444	444
		Sumatran orangutan	XM_002817022.3	Pongo abelii	71 to 364	387 to 444	444
	Cercopithecidae	Peters's Angola colobus	XM_011960196.1	Colobus angolensis palliatus	71 to 364	387 to 444	444
		golden snub-nosed monkey	XM_010375141.1	Rhinopithecus roxellana	71 to 364	387 to 444	444
	Callitrichidae	common marmoset	XM_008994619.2	Callithrix jacchus	71 to 378	401 to 458	458
	Tarsiidae	Philippine tarsier	XM_008066336.1	Tarsius syrichta	71 to 364	387 to 444	444
	Indriidae	Coquerel's sifaka	XM_012648723.1	Propithecus coquereli	71 to 364	387 to 444	461
	Galagidae	northern greater galago	XM_003789655.2	Otolemur garnettii	71 to 364	387 to 444	444
Rodentia	Cricetidae	deer mouse	XM_006973736.2	Peromyscus maniculatus bairdii	71 to 365	387 to 444	461
	Muridae	house mouse	NM_198962.3	Mus musculus	71 to 364	386 to 443	460
		brown rat	NM_013074.1	Rattus norvegicus	71 to 364	386 to 443	460
	Heterocephalidae	naked mole-rat	XM_004868829.1	Heterocephalus glaber	72 to 365	388 to 445	445
	Spalacidae	Upper Galilee Mountains blind mole-rat	XM_008846124.1	Nannospalax galili	71 to 364	387 to 444	461
	Heteromyidae	Ord's kangaroo rat	XM_013019060.1	Dipodomys ordii	72 to 365	388 to 444	444
	Dipodidae	lesser Egyptian jerboa	XM_004668188.1	Jaculus jaculus	70 to 363	386 to 443	443
	Caviidae	guinea pig	XM_013142764.1	Cavia porcellus	67 to 373	396 to 458	458
Artiodactyla	Bovidae	cow	NM_001192677.1	Bos taurus	71 to 364	387 to 444	444
		Tibetan antelope	XM_005965150.1	Pantholops hodgsonii	71 to 364	387 to 444	444
	Physeteridae	sperm whale	XM_007107746.1	Physeter catodon	71 to 364	387 to 444	444
	Lipotidae	baiji	XM_007471200.1	Lipotes vexillifer	15 to 306	329 to 386	386
	Balaenopteridae	northern minke whale	XM_007186948.1	Balaenoptera acutorostrata scammoni	71 to 364	387 to 445	445
	Camelidae	wild Bactrian camel	XM_006182385.1	Camelus ferus	1 to 291	314 to 371	371
		Bactrian camel	XM_010973962.1	Camelus bactrianus	1 to 291	314 to 371	371
		alpaca	XM_006211525.1	Vicugna pacos	71 to 364	387 to 444	457
Carnivora	Felidae	domestic cat	XM_003986250.3	Felis catus	71 to 364	387 to 444	444
		cheetah	XM_015070114.1	Acinonyx jubatus	71 to 364	387 to 444	444
		Siberian tiger	XM_007095539.2	Panthera tigris altaica	71 to 364	387 to 444	444
	Ursidae	giant panda	XM_002923075.2	Ailuropoda melanoleuca	71 to 364	387 to 444	444
		polar bear	XM_008691768.1	Ursus maritimus	71 to 364	387 to 444	444
	Canidae	domestic dog	NM_001002933.1	Canis lupus familiaris	71 to 364	387 to 444	444
	Phocidae	Weddell seal	XM_006728130.1	Leptonychotes weddellii	71 to 364	387 to 444	444
	Odobenidae	walrus	XM_012567968.1	Odobenus rosmarus divergens	71 to 364	387 to 444	461
	Mustelidae	ferret	XM_004772409.2	Mustela putorius furo	71 to 364	387 to 444	461
Chiroptera	Vespertilionidae	David's myotis	XM_006757744.2	Myotis davidii	71 to 364	387 to 444	444
		Natal long-fingered bat	XM_016198057.1	Miniopterus natalensis	69 to 362	385 to 442	442
		big brown bat	XM_008151558.1	Eptesicus fuscus	71 to 364	387 to 444	444
Perissodactyla	Equidae	Przewalski's horse	XM_008544078.1	Equus przewalskii	57 to 348	371 to 428	428
Eulipotyphla	Soricidae	common shrew	XM_004615791.1	Sorex araneus	71 to 364	387 to 444	463
	Talpidae	star-nosed mole	XM_004673583.1	Condylura cristata	71 to 364	387 to 444	461
Lagomorpha	Leporidae	common rabbit	XM_002714513.3	Oryctolagus cuniculus	71 to 364	387 to 444	461
	Ochotonidae	American pika	XM_004580569.1	Ochotona princeps	72 to 365		400
Macroscelidea	Macroscelididae	Cape elephant shrew	XM_006893137.1	Elephantulus edwardii	71 to 364	387 to 444	444
Tubulidentata	Orycteropodidae	aardvark	XM_007945623.1	Orycteropus afer afer	71 to 364	387 to 444	444
Cingulata	Dasypodidae	nine-banded armadillo	XM_004453642.1	Dasypus novemcinctus	42 to 333	356 to 413	430
Monotremata	Ornithorhynchidae	platypus	XM_016228308.1	Ornithorhynchus anatinus		113 to 170	187
Passeriformes	Paridae	ground tit	XM_005518107.1	Pseudopodoces humilis	73 to 366	389 to 443	501
	Fringillidae	Atlantic canary	XM_009094541.2	Serinus canaria	73 to 366	389 to 443	501
	Estrildidae	zebra finch	XM_002195211.1	Taeniopygia guttata	73 to 366	389 to 443	501
	Sturnidae	common starling	XM_014869474.1	Sturnus vulgaris	73 to 366	389 to 443	501
	Pipridae	golden-collared manakin	XM_008921279.2	Manacus vitellinus	73 to 366	387 to 442	499
	Muscicapidae	collared flycatcher	XM_005044164.2	Ficedula albicollis	72 to 365	388 to 442	500
	Thraupidae	medium ground finch	XM_005427914.1	Geospiza fortis	73 to 366	389 to 443	501
Falconiformes	Falconidae	peregrine falcon	XM_005238118.1	Falco peregrinus	73 to 366	389 to 444	501
		saker falcon	XM_005441862.1	Falco cherrug	73 to 366	389 to 444	501
Accipitriformes	Accipitridae	golden eagle	XM_011599076.1	Aquila chrysaetos canadensis	1 to 280	303 to 358	415
		bald eagle	XM_010566369.1	Haliaeetus leucocephalus	1 to 280	303 to 358	415
Pelecaniformes	Ardeidae	little egret	XM_009638782.1	Egretta garzetta	73 to 366	389 to 443	501
	Threskiornithidae	crested ibis	XM_009474379.1	Nipponia nippon	73 to 366	389 to 444	501
Anseriformes	Anatidae	wild duck	XM_005009180.2	Anas platyrhynchos	73 to 366	389 to 444	501
		Domestic geese	XM_013172269.1	Anser cygnoides domesticus	73 to 366	389 to 443	501
Galliformes	Phasianidae	Japanese quail	XM_015859165.1	Coturnix japonica	73 to 366	389 to 444	501
		red junglefowl	NM_001024584.1	Gallus gallus	73 to 366	389 to 444	501
Sphenisciformes	Spheniscidae	emperor penguin	XM_009279732.1	Aptenodytes forsteri	73 to 366	389 to 444	501
		Adélie penguin	XM_009333178.1	Pygoscelis adeliae	1 to 280	303 to 358	415
Charadriiformes	Charadriidae	killdeer	XM_009879831.1	Charadrius vociferus	73 to 366	389 to 443	501
	Scolopacidae	ruff	XM_014948921.1	Calidris pugnax	73 to 366	389 to 444	501
Piciformes	Picidae	downy woodpecker	XM_009911650.1	Picoides pubescens	73 to 366	389 to 444	501
Apodiformes	Apodidae	chimney swift	XM_009999196.1	Chaetura pelagica	73 to 366	389 to 444	501
	Trochilidae	Anna's hummingbird	XM_008495641.1	Calypte anna	73 to 366	389 to 444	501
Opisthocomiformes	Opisthocomidae	hoatzin	XM_009942336.1	Opisthocomus hoazin	73 to 366	389 to 444	501
Columbiformes	Columbidae	rock dove	XM_005506769.1	Columba livia	73 to 366	389 to 444	501
Cuculiformes	Cuculidae	common cuckoo	XM_009567776.1	Cuculus canorus	74 to 367	390 to 444	502
Tinamiformes	Tinamidae	white-throated tinamou	XM_010222409.1	Tinamus guttatus	76 to 369	392 to 447	504
Struthioniformes	Struthionidae	South African ostrich	XM_009687028.1	Struthio camelus australis	1 to 280	303 to 358	415
Cyprinodontiformes	Poeciliidae	southern platyfish	XM_005811894.1	Xiphophorus maculatus	69 to 362	384 to 422	422
	Fundulidae	mummichog	XM_012877727.1	Fundulus heteroclitus	69 to 362	384 to 422	422
	Cyprinodontidae	sheepshead minnow	XM_015374497.1	Cyprinodon variegatus	69 to 362	384 to 421	421
	Aplocheilidae	mangrove killifish	XM_017412898.1	Kryptolebias marmoratus	69 to 362	384 to 422	422
		-	XM_014017290.1	Austrofundulus limnaeus	69 to 362	384 to 422	422
Cypriniformes	Cyprinidae	zebrafish	EF150847.1	Danio rerio	71 to 364	387 to 424	424
		-	XM_016567255.1	Sinocyclocheilus rhinocerous	69 to 362	384 to 422	422
		-	XM_016477140.1	Sinocyclocheilus anshuiensis	69 to 362	384 to 422	422
		Dianchi golden-line fish	XM_016288898.1	Sinocyclocheilus grahami	69 to 362	385 to 422	422
Perciformes	Cichlidae	zebra mbuna	XM_004555954.1	Maylandia zebra	69 to 362	384 to 422	422
		Burton's mouthbrooder	XM_005915522.2	Haplochromis burtoni	69 to 362	384 to 422	422
		Nile tilapia	XM_013269038.1	Oreochromis niloticus	13 to 305	327 to 365	365
Characiformes	Serrasalmidae	red-bellied piranha	XM_017694049.1	Pygocentrus nattereri	67 to 364	387 to 423	423
Beloniformes	Adrianichthyidae	Japanese rice fish	XM_004077422.2	Oryzias latipes	69 to 362	385 to 424	424
Pleuronectiformes	Cynoglossidae	Tongue sole	XM_008322099.2	Cynoglossus semilaevis	69 to 362	384 to 422	422
Tetraodontiformes	Tetraodontidae	Tiger puffer	XM_011603410.1	Takifugu rubripes	69 to 362	381 to 419	419
Salmoniformes	Salmonidae	Atlantic salmon	XM_014180132.1	Salmo salar	69 to 362	385 to 422	422
Esociformes	Esocidae	northern pike	XM_010888969.1	Esox lucius	67 to 356	379 to 417	417
Siluriformes	Ictaluridae	Channel catfish	XM_017463203.1	Ictalurus punctatus	65 to 362	384 to 421	421
Lepisosteiformes	Lepisosteidae	spotted gar	XM_006638857.2	Lepisosteus oculatus	70 to 363	387 to 440	440
Perciformes	Pomacentridae	bicolor damselfish	XM_008297603.1	Stegastes partitus	67 to 360	379 to 420	420
	Sciaenidae	large yellow croaker	XM_010756724.1	Larimichthys crocea	69 to 362	385 to 422	422
Coelacanthiformes	Latimeriidae	West Indian Ocean coelacanth	XM_006007931.2	Latimeria chalumnae	107 to 400	423 to 479	714
Chimaeriformes	Callorhinchidae	Australian ghostshark	XM_007894085.1	Callorhinchus milii	73 to 367	389 to 445	445
Squamata	Colubridae	common garter snake	XM_014052736.1	Thamnophis sirtalis	73 to 366	389 to 443	443
	Viperidae	Brown Spotted Pit Viper	XM_015826558.1	Protobothrops mucrosquamatus	57 to 310	333 to 387	387
	Pythonidae	Burmese python	XM_007434772.1	Python bivittatus	73 to 366	389 to 443	443
	Polychrotidae	Carolina anole	XM_003226072.3	Anolis carolinensis	73 to 366	392 to 448	448
	Gekkonidae	Schlegel's Japanese gecko	XM_015423978.1	Gekko japonicus	5 to 295	319 to 374	374
Testudines	Cheloniidae	green sea turtle	XM_007055066.1	Chelonia mydas	72 to 365	388 to 443	500
	Trionychidae	Chinese softshell turtle	XM_006110969.2	Pelodiscus sinensis	73 to 366	389 to 444	501
Crocodilia	Alligatoridae	American alligator	XM_006262422.2	Alligator mississippiensis	73 to 366	389 to 444	501
Anura	Pipidae	African clawed frog	NM_001246233.1	Xenopus laevis	69 to 361	384 to 440	440
Enterogona	Cionidae	vase tunicate	XM_018817526.1	Ciona intestinalis	68 to 453		504
